# Supplementary material
Source: PubMed Central journal article supplement (PMC3686553)
Supplement: NIHMS485181-supplement-01.pdf [file NIHMS485181-supplement-01.pdf]

## ONLINE DATA SUPPLEMENT

### PHARMACOGENOMIC ASSOCIATION OF NON-SYNONYMOUS SNPS IN *SIGLEC12*, *A1BG* AND THE SELECTIN REGION AND CARDIOVASCULAR OUTCOMES

Caitrin W. McDonough<sup>1</sup>, Yan Gong<sup>1</sup>, Sandosh Padmanabhan<sup>2</sup>, Ben Burkley<sup>1</sup>, Taimour Y. Langae<sup>1</sup>, Olle Melander<sup>3</sup>, Carl J. Pepine<sup>4</sup>, Anna F. Dominiczak<sup>2</sup>, Rhonda M. Cooper-DeHoff<sup>1,4</sup>, Julie A. Johnson<sup>1,4</sup>

<sup>1</sup>Department of Pharmacotherapy and Translational Research and Center for Pharmacogenomics, University of Florida, College of Pharmacy, Gainesville, FL

<sup>2</sup>Institute of Cardiovascular and Medical Sciences, College of Medical, Veterinary and Life Sciences, University of Glasgow, Glasgow G12 8TA, United Kingdom

<sup>3</sup>Department of Clinical Sciences, Lund University, Malmö, Sweden

<sup>4</sup>Division of Cardiovascular Medicine, Department of Medicine, University of Florida, Gainesville, FL

Short title: *Pharmacogenetics & hypertension treatment outcomes*

Corresponding Author:

Julie A. Johnson, Pharm.D.

Distinguished Professor of Pharmacy (Department of Pharmacotherapy and Translational Research) and Medicine (Cardiovascular Medicine)

V Ravi Chandran Professor of Pharmaceutical Sciences

Director, Center for Pharmacogenomics

Director, Personalized Medicine Program (University of Florida & Shands)

University of Florida

Box 100486

Gainesville, FL 32610-0486

352-273-6007 (phone)

352-273-6485 (fax)

Johnson@cop.ufl.edu

## SUPPLEMENTAL METHODS

### ***Study design and participants.***

**INVEST.** INVEST ([www.clinicaltrials.gov](http://www.clinicaltrials.gov), NCT00133692) was a prospective, randomized, open-label, blinded-end point trial in 22,576 patients aged 50 or older with HTN and coronary artery disease (CAD). Patients were randomized to a verapamil-SR (calcium channel blocker, CCB) or an atenolol ( $\beta$ -blocker,  $\beta$ B) based treatment strategy. Hydrochlorothiazide (HCTZ) and trandolapril were available as add-on treatment in either strategy for BP control, with trandolapril added first to verapamil-SR and HCTZ added first to atenolol. The primary outcome (PO) was the first occurrence of all-cause death, nonfatal myocardial infarction (MI) or nonfatal stroke. Secondary outcomes included the individual components of the PO. Events were adjudicated by an independent committee that was blinded to treatment strategy. The methods and results of INVEST have been previously published.<sup>1</sup>

**NORDIL.** NORDIL was a HTN outcomes trial including 10,881 subjects in Norway and Sweden comparing a CCB strategy (diltiazem), to conventional antihypertensive treatment utilizing diuretics,  $\beta$ Bs, or both. Patients were 50-74 years old, with an untreated DBP  $\geq$ 100 mmHg. The primary endpoint was fatal or nonfatal stroke, fatal or nonfatal MI, or other CV death, and information is available on all death events. The methods and results of NORDIL have been previously published.<sup>2</sup>

### ***Genotyping and Quality Control***

**INVEST-GENES.** Genomic DNA was extracted from buccal cells obtained by mouthwash using the Gentra Systems PureGene kit. Patients were genotyped on the Illumina HumanCVD (Cardiovascular Disease) Beadchip, a gene-centric array containing ~50,000 SNPs in ~2,100 genes involved in cardiovascular, inflammatory, and metabolic processes.<sup>3</sup> Genotyping was performed on Illumina's iScan System using the Infinium II Assay (Illumina, San Diego, CA). Genotypes were called using GenomeStudio Software version 2011.1 and the Genotyping Module version 1.9 calling algorithm (Illumina, San Diego, CA). Patients were excluded if sample genotype call rates were below 95% and SNPs were excluded if genotype call rates were below 90%. Eighty-seven blind duplicates were included in genotyping and had a concordance rate of 99.997%. Gender was confirmed from X chromosome genotype data, and those who were discordant were excluded. Cryptic relatedness was estimated by pairwise identity-by-descent (IBD) analysis implemented using PLINK<sup>4</sup> (<http://pngu.mgh.harvard.edu/purcell/plink/>). Ten pairs of samples were identified as first degree relatives; these individuals were kept for the analysis and sensitivity analyses were performed without these subjects. Heterozygosity was assessed using PLINK, by estimating the inbreeding coefficient, F. Six subjects had F values > 4 standard deviations from the mean. One of these subjects also had a high missing genotype rate of > 4% and this subject was excluded. Outliers in the by race/ethnic group Principal Component Analysis were also removed ( $n=4$ ). The final case-control cohort consisted of 1,345 subjects.

**NORDIL.** 4,196 subjects were successfully genotyped on the Illumina 610Quad genome-wide array (Illumina, San Diego, CA) and the technology described above.

Standard quality control procedures were applied. Genotypes were imputed to 2.4 million SNPs using the CEU panel from HapMap 2.

**Principal Component Analysis in INVEST.** To address the issue of population substructure and admixture in our racially and ethnically diverse population, a Principal Component Analysis (PCA) was performed in all subjects on a linkage disequilibrium (LD) pruned dataset using the EIGENSTRAT method<sup>5</sup> implemented through JMP Genomics version 5.0 (SAS, Cary, NC). Race/ethnic groups were confirmed with PCA clustering results. If race/ethnic category disagreed strongly with the race/ethnicity information recorded during the trial, patients were re-categorized to reflect the PCA result, considered to better reflect genetic ancestry. Then, PCA was performed in each genetically determined race/ethnic group. The top principal components that provided the best separation of ancestry clusters were selected to be included as covariates for analysis: PCs 1-3 in the by race analyses, and PCs 1-2 in the combined cohort.

### **Statistical Analysis**

**Hardy-Weinberg equilibrium.** Hardy-Weinberg equilibrium was evaluated by race/ethnic group using an exact test, implemented through PLINK.<sup>4</sup>

**Haplotype Analysis and Linkage Disequilibrium.** Haplotypes were reconstructed in each race/ethnic group in INVEST from raw genotype data for *SELP* rs6125 and *SELE* rs5361 using PHASE version 2.<sup>6</sup> Each haplotype was coded according to the number of copies (zero, one or two). Haplotype x treatment interaction analysis was performed by race/ethnic group using SAS version 9.2 (Cary, NC). Pairwise measure of  $r^2$  and  $D'$  were assessed using Haploview version 4.2.<sup>7</sup>

**Initial Genetic Risk Score Calculations.** Genetic risk scores were first calculated in INVEST (whites and Hispanics) based on a two SNP model, including rs16982743 and rs893184; and then on a three SNP model, testing each of the significant SNPs on chromosome 1 with the chromosome 19 SNPs above. The genetic risk score was tested for replication in NORDIL, testing the three 3 SNP models that performed better than the two SNP model in INVEST (the chromosome 19 SNPs plus rs4525, rs6125, or rs6131), and had a MAF >1% in NORDIL (rs9332701 model was excluded for low MAF). Additionally, the haplotype model was not tested in NORDIL as the genotype data was imputed and haplotypes were unable to be phased.

### **Supplemental References.**

1. Pepine CJ, Handberg EM, Cooper-DeHoff RM, Marks RG, Kowey P, Messerli FH, Mancina G, Cangiano JL, Garcia-Barreto D, Keltai M, Erdine S, Bristol HA, Kolb HR, Bakris GL, Cohen JD, Parmley WW. A calcium antagonist vs a non-calcium antagonist hypertension treatment strategy for patients with coronary artery disease. The international verapamil-trandolapril study (invest): A randomized controlled trial. *JAMA*. 2003;290:2805-2816.
2. Hansson L, Hedner T, Lund-Johansen P, Kjeldsen SE, Lindholm LH, Syvertsen JO, Lanke J, de Faire U, Dahlof B, Karlberg BE. Randomised trial of effects of

calcium antagonists compared with diuretics and beta-blockers on cardiovascular morbidity and mortality in hypertension: The nordic diltiazem (nordil) study. *Lancet*. 2000;356:359-365.

3. Keating BJ, Tischfield S, Murray SS, Bhangale T, Price TS, Glessner JT, Galver L, Barrett JC, Grant SF, Farlow DN, Chandrupatla HR, Hansen M, Ajmal S, Papanicolaou GJ, Guo Y, Li M, Derohannessian S, de Bakker PI, Bailey SD, Montpetit A, Edmondson AC, Taylor K, Gai X, Wang SS, Fornage M, Shaikh T, Groop L, Boehnke M, Hall AS, Hattersley AT, Frackelton E, Patterson N, Chiang CW, Kim CE, Fabsitz RR, Ouwehand W, Price AL, Munroe P, Caulfield M, Drake T, Boerwinkle E, Reich D, Whitehead AS, Cappola TP, Samani NJ, Lusk AJ, Schadt E, Wilson JG, Koenig W, McCarthy MI, Kathiresan S, Gabriel SB, Hakonarson H, Anand SS, Reilly M, Engert JC, Nickerson DA, Rader DJ, Hirschhorn JN, Fitzgerald GA. Concept, design and implementation of a cardiovascular gene-centric 50 k snp array for large-scale genomic association studies. *PLoS One*. 2008;3:e3583.
4. Purcell S, Neale B, Todd-Brown K, Thomas L, Ferreira MA, Bender D, Maller J, Sklar P, de Bakker PI, Daly MJ, Sham PC. Plink: A tool set for whole-genome association and population-based linkage analyses. *Am J Hum Genet*. 2007;81:559-575.
5. Price AL, Patterson NJ, Plenge RM, Weinblatt ME, Shadick NA, Reich D. Principal components analysis corrects for stratification in genome-wide association studies. *Nat Genet*. 2006;38:904-909.
6. Stephens M, Donnelly P. A comparison of bayesian methods for haplotype reconstruction from population genotype data. *Am J Hum Genet*. 2003;73:1162-1169.
7. Barrett JC, Fry B, Maller J, Daly MJ. Haploview: Analysis and visualization of ld and haplotype maps. *Bioinformatics*. 2005;21:263-265.

**Table S1.** Baseline Demographics and Characteristics stratified by treatment strategy.

| Characteristic                   | INVEST Whites<br>(n=795) |                    | INVEST Hispanics<br>(n=380) |                    | NORDIL<br>(n=4196) |                              |
|----------------------------------|--------------------------|--------------------|-----------------------------|--------------------|--------------------|------------------------------|
|                                  | CCB<br>n=398             | $\beta$ B<br>n=397 | CCB<br>n=199                | $\beta$ B<br>n=181 | CCB<br>n=2093      | $\beta$ B/Diuretic<br>n=2103 |
| Age, mean (SD) y                 | 69.9 $\pm$ 9.6           | 71.7 $\pm$ 9.3     | 72.2 $\pm$ 8.8              | 72.4 $\pm$ 8.9     | 60.2 $\pm$ 6.6     | 60.0 $\pm$ 6.6               |
| Male                             | 213 (53.5)               | 202 (50.9)         | 87 (43.7)                   | 98 (54.2)          | 1049 (50.1)        | 1044 (49.6)                  |
| BMI, mean (SD) kg/m <sup>2</sup> | 28.8 $\pm$ 5.3           | 28.4 $\pm$ 5.6     | 27.4 $\pm$ 4.7              | 28.2 $\pm$ 4.4     | 28.0 $\pm$ 4.4     | 28.3 $\pm$ 4.4               |
| SBP, mean (SD), mm Hg            | 147.4 $\pm$ 18.9         | 149.9 $\pm$ 16.0   | 148.3 $\pm$ 18.3            | 147.8 $\pm$ 18.9   | 173.0 $\pm$ 18.8   | 172.1 $\pm$ 19.0             |
| DBP, mean (SD), mm Hg            | 81.3 $\pm$ 10.6          | 82.0 $\pm$ 10.1    | 85.2 $\pm$ 9.8              | 84.9 $\pm$ 10.4    | 103.1 $\pm$ 7.2    | 103.1 $\pm$ 7.2              |
| Heart Rate, mean (SD), beats/min | 75.2 $\pm$ 9.5           | 75.2 $\pm$ 9.2     | 74.2 $\pm$ 8.9              | 73.0 $\pm$ 9.3     | N/A                | N/A                          |
| History of                       |                          |                    |                             |                    |                    |                              |
| Diabetes                         | 75 (18.8)                | 78 (19.6)          | 44 (22.1)                   | 46 (25.4)          | 172 (8.2)          | 170 (8.1)                    |
| Heart Failure (class I to III)   | 25 (6.3)                 | 25 (6.3)           | 12 (6.0)                    | 6 (3.3)            | N/A                | N/A                          |
| Myocardial Infarction            | 138 (34.7)               | 142 (35.8)         | 24 (12.1)                   | 29 (16.0)          | 48 (2.3)           | 53 (2.5)                     |

Values are presented as number (percentage) unless otherwise noted. SD: Standard Deviation. kg: kilograms. m: meters. SBP: systolic blood pressure. DBP: diastolic blood pressure. mm Hg: millimeters of Mercury. min: minute. N/A: characteristic not available in NORDIL genetic study. CCB: calcium channel blocker.  $\beta$ B:  $\beta$ -blocker.

**Table S2.** Genotype Frequencies and Hardy-Weinberg Equilibrium *P*-values in INVEST and NORDIL.

| Marker          | Alleles  |          | Minor Allele Frequency | Genotype Frequencies<br>mm/mM/MM | Hardy-Weinberg Equilibrium <i>P</i> value |
|-----------------|----------|----------|------------------------|----------------------------------|-------------------------------------------|
|                 | minor(m) | Major(M) |                        |                                  |                                           |
| INVEST White    |          |          |                        |                                  |                                           |
| rs16982743      | A        | G        | 0.179                  | 26/233/536                       | 0.9041                                    |
| rs893184        | A        | G        | 0.046                  | 4/65/723                         | 0.0781                                    |
| rs9332701       | G        | A        | 0.038                  | 1/59/735                         | 1                                         |
| rs4525          | G        | A        | 0.260                  | 49/316/430                       | 0.4076                                    |
| rs6131          | A        | G        | 0.180                  | 26/234/535                       | 0.9047                                    |
| rs6125          | A        | G        | 0.057                  | 1/88/705                         | 0.5057                                    |
| rs5361          | C        | A        | 0.096                  | 7/139/647                        | 1                                         |
| INVEST Hispanic |          |          |                        |                                  |                                           |
| rs16982743      | A        | G        | 0.195                  | 17/114/248                       | 0.4135                                    |
| rs893184        | A        | G        | 0.101                  | 4/68/304                         | 0.7816                                    |
| rs9332701       | G        | A        | 0.012                  | 0/9/371                          | 1                                         |
| rs4525          | G        | A        | 0.362                  | 48/179/153                       | 0.7398                                    |
| rs6131          | A        | G        | 0.201                  | 15/122/242                       | 1                                         |
| rs6125          | A        | G        | 0.070                  | 2/49/329                         | 0.7010                                    |
| rs5361          | C        | A        | 0.070                  | 2/49/329                         | 0.7010                                    |
| NORDIL          |          |          |                        |                                  |                                           |
| rs16982743      | A        | G        | 0.191                  | 148/1254/2657                    | 1                                         |
| rs893184        | A        | G        | 0.045                  | 8/359/3828                       | 1                                         |
| rs9332701       | G        | A        | 0.005                  | 0/32/2918                        | 1                                         |
| rs4525          | G        | A        | 0.255                  | 263/1613/2319                    | 0.4644                                    |
| rs6131          | A        | G        | 0.209                  | 185/1383/2627                    | 0.8519                                    |
| rs6125          | A        | G        | 0.073                  | 28/559/3609                      | 0.2107                                    |
| rs5361          | C        | A        | 0.111                  | 49/832/3314                      | 0.7541                                    |

**Table S3.** Pairwise  $r^2$  and  $D'$  between rs16982743 and rs893184 on chromosome 19 in INVEST whites and Hispanics.

| SNP 1      | SNP 2    | $D'$ | $r^2$ |
|------------|----------|------|-------|
| Whites     |          |      |       |
| rs16982743 | rs893184 | 0.03 | 0     |
| Hispanics  |          |      |       |
| rs16982743 | rs893184 | 0.24 | 0.02  |

**Table S4.** Chromosome 1 rs6125-rs5361 Haplotype-Treatment Interaction in INVEST.

| SNPs    | Chr | Positions    | Genes | Amino Acid Changes | Coded Haplotype | Race  | Haplotype Frequency | Interaction <i>P</i> -value | Combined Interaction <i>P</i> -value |
|---------|-----|--------------|-------|--------------------|-----------------|-------|---------------------|-----------------------------|--------------------------------------|
| rs6125, | 1   | 167,848,941, | SELP, | V209M,             | GA              | White | 0.8472              | 0.0097                      | 0.0003                               |
| rs5361  |     | 167,967,684  | SELE  | S149R              | (Val-Ser)       | Hisp  | 0.8605              | 0.0028                      |                                      |

Chr: Chromosome. Position: NCBI build 36 position.



**Table S5.** SNP Treatment Interaction in INVEST and NORDIL

| Chr | SNP        | Gene     | A1 | INVEST White |      |                | INVEST Hispanic |      |                | NORDIL |      |                | Meta-Analysis  |           |
|-----|------------|----------|----|--------------|------|----------------|-----------------|------|----------------|--------|------|----------------|----------------|-----------|
|     |            |          |    | MAF          | OR   | <i>P</i> value | MAF             | OR   | <i>P</i> value | MAF    | OR   | <i>P</i> value | <i>P</i> value | Direction |
| 19  | rs16982743 | SIGLEC12 | A  | 0.179        | 1.98 | 0.0329         | 0.195           | 3.13 | 0.0215         | 0.191  | 1.16 | 0.4655         | 0.0032         | +++       |
| 19  | rs893184   | A1BG     | A  | 0.046        | 5.08 | 0.0248         | 0.101           | 5.12 | 0.0310         | 0.045  | 1.34 | 0.4004         | 0.0029         | +++       |
| 1   | rs9332701  | F5       | G  | 0.038        | 8.66 | 0.0110         | 0.012           | 4.78 | 0.3948         | 0.005  | 1.86 | 0.6200         | 0.0283         | +++       |
| 1   | rs4525     | F5       | G  | 0.260        | 0.83 | 0.5554         | 0.362           | 2.65 | 0.0242         | 0.255  | 1.32 | 0.1261         | 0.0509         | -++       |
| 1   | rs6131     | SELP     | A  | 0.180        | 0.46 | 0.0254         | 0.201           | 0.41 | 0.0686         | 0.209  | 1.36 | 0.1174         | 0.1349         | --+       |
| 1   | rs6125     | SELP     | A  | 0.057        | 0.39 | 0.1001         | 0.070           | 0.09 | 0.0023         | 0.073  | 1.61 | 0.1351         | 0.0556         | --+       |
| 1   | rs5361     | SELE     | C  | 0.096        | 0.43 | 0.0486         | 0.070           | 0.41 | 0.2659         | 0.111  | 1.16 | 0.5510         | 0.1638         | --+       |

Chr: Chromosome. A1: Minor Allele. MAF: Minor Allele Frequency. OR: Odds Ratio.

**A) *SIGLEC12* rs16982743**

|              |              | Event, n (%) |            | OR (95% CI)         | P-value |
|--------------|--------------|--------------|------------|---------------------|---------|
|              |              | CCB          | $\beta$ B  |                     |         |
| <b>White</b> | Stop Carrier | 31 (23.5%)   | 36 (28.3%) | 0.778 (0.432-1.40)  | 0.4015  |
|              | Gln/Gln      | 58 (21.8%)   | 34 (12.6%) | 1.944 (1.205-3.136) | 0.0065  |
| <b>Hisp</b>  | Stop Carrier | 17 (22.1%)   | 15 (27.8%) | 0.919 (0.369-2.289) | 0.8553  |
|              | Gln/Gln      | 26 (21.3%)   | 17 (13.5%) | 2.114 (0.999-4.475) | 0.0503  |
| <b>All</b>   | Stop Carrier | 48 (23.0%)   | 51 (28.2%) | 0.823 (0.511-1.326) | 0.4241  |
|              | Gln/Gln      | 84 (21.6%)   | 51 (12.9%) | 1.911 (1.289-2.832) | 0.0013  |

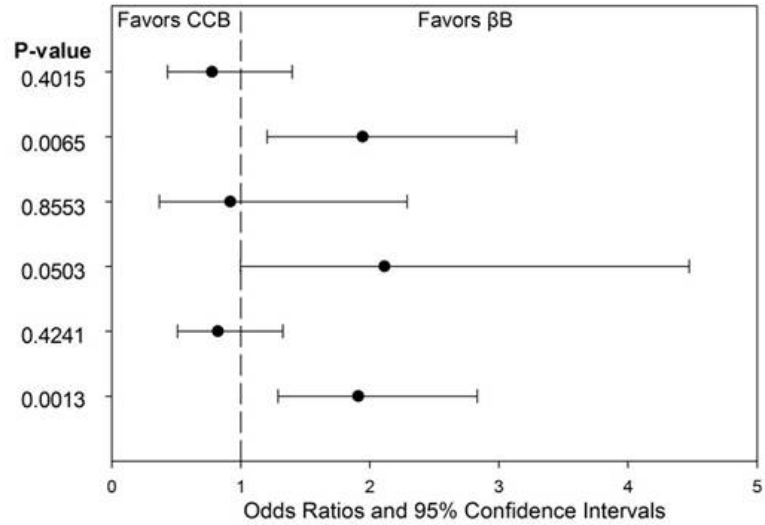

**B) *A1BG* rs893184**

|              |             | Event, n (%) |            | OR (95% CI)         | P-value |
|--------------|-------------|--------------|------------|---------------------|---------|
|              |             | CCB          | $\beta$ B  |                     |         |
| <b>White</b> | His Carrier | 3 (8.6%)     | 7 (20.6%)  | 0.068 (0.005-0.967) | 0.0472  |
|              | Arg/Arg     | 86 (23.8%)   | 63 (17.4%) | 1.527 (1.052-2.216) | 0.026   |
| <b>Hisp</b>  | His Carrier | 4 (11.4%)    | 9 (24.3%)  | 0.281 (0.063-1.249) | 0.0954  |
|              | Arg/Arg     | 39 (23.9%)   | 23 (16.3%) | 1.914 (1.012-3.622) | 0.046   |
| <b>All</b>   | His Carrier | 7 (10.0%)    | 16 (22.5%) | 0.216 (0.067-0.698) | 0.0105  |
|              | Arg/Arg     | 125 (23.9%)  | 86 (17.1%) | 1.602 (1.168-2.196) | 0.0034  |

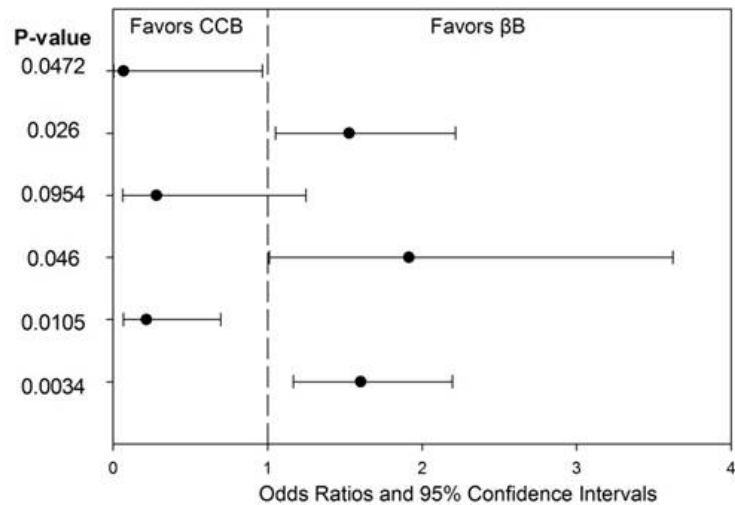

**Figure S1. Pharmacogenomic association with the primary outcome. A) *SIGLEC12* rs16982743. B) *A1BG* rs893184. n: number.**

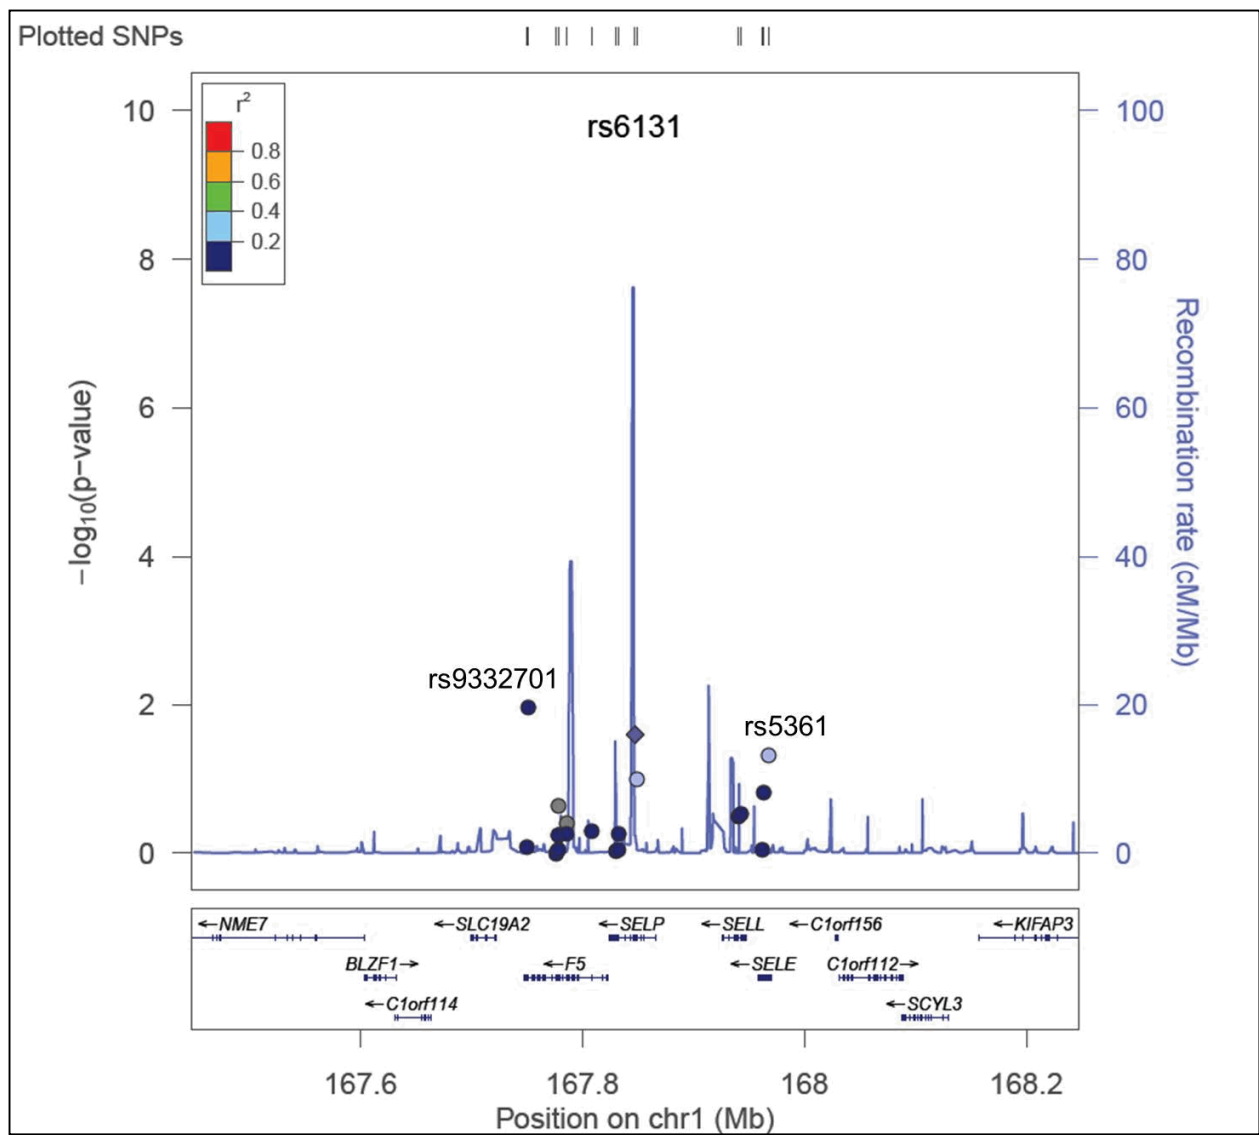

**Figure S2.** Regional plot of the *F5-SELP-SELL-SELE* region on chromosome 1 in INVEST whites. *P*-value displayed is the SNP×Treatment interaction *P*-value.

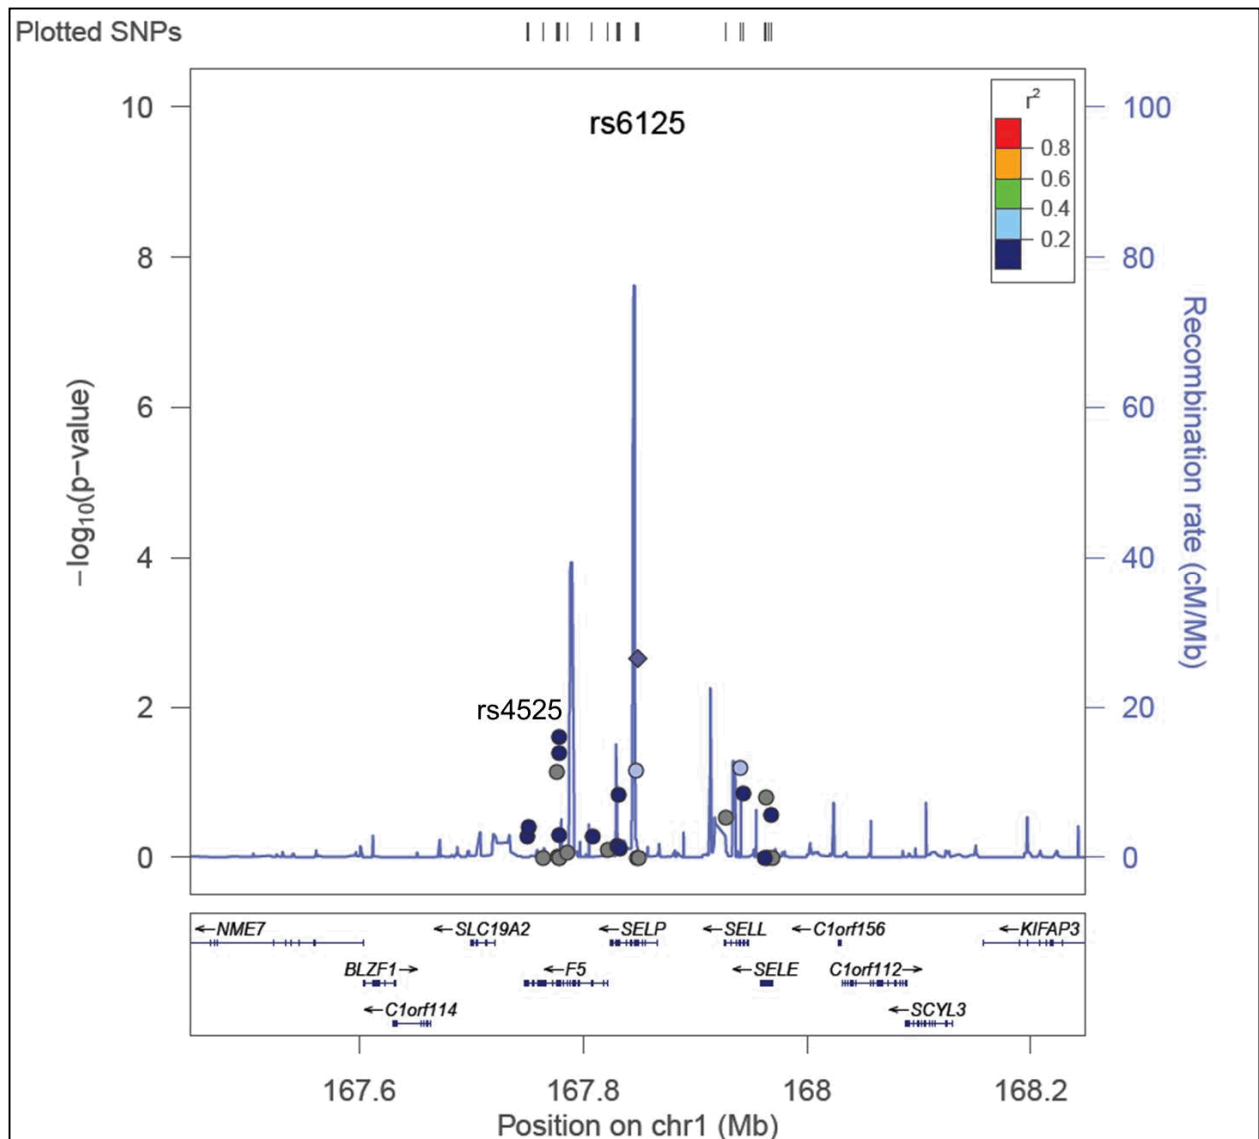

**Figure S3.** Regional plot of the *F5-SELP-SELL-SELE* region on chromosome 1 in INVEST Hispanics. *P*-value displayed is the SNP×Treatment interaction *P*-value.

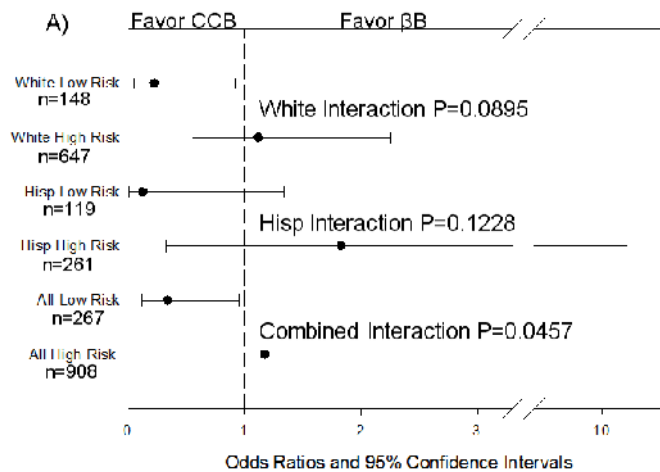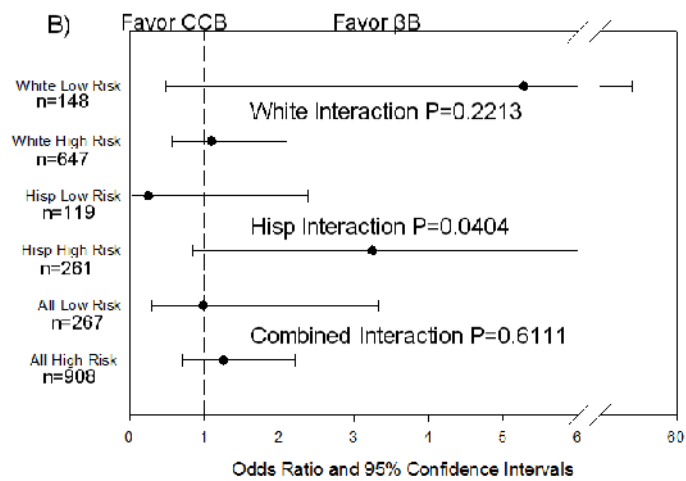

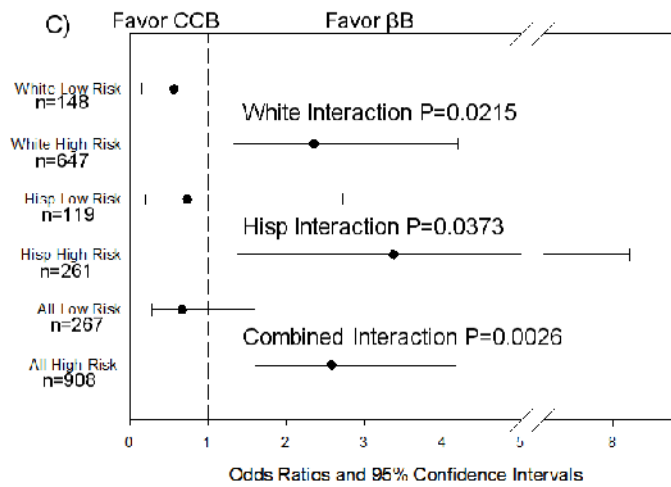

**Figure S4.** Risk-Score x Treatment Interaction analysis for secondary outcomes in INVEST. A) Nonfatal Myocardial Infarction (MI). B) Nonfatal Stroke. C) All-Cause Death.

CCB: Calcium Channel Blocker. betaB: beta-Blocker. Low Risk defined as risk score = 0 or 1; High Risk defined as risk score = 2 or 3.
